# Supplementary material for: Ultra stable ordered mesoporous phenol/formaldehyde polymers as a heterogeneous support for vanadium oxide
Source: Royal Society of Chemistry journal article supplement (doi:10.1039/b808566h), 2008-01-01
Supplement: b808566h1.pdf [file b808566h1.pdf]

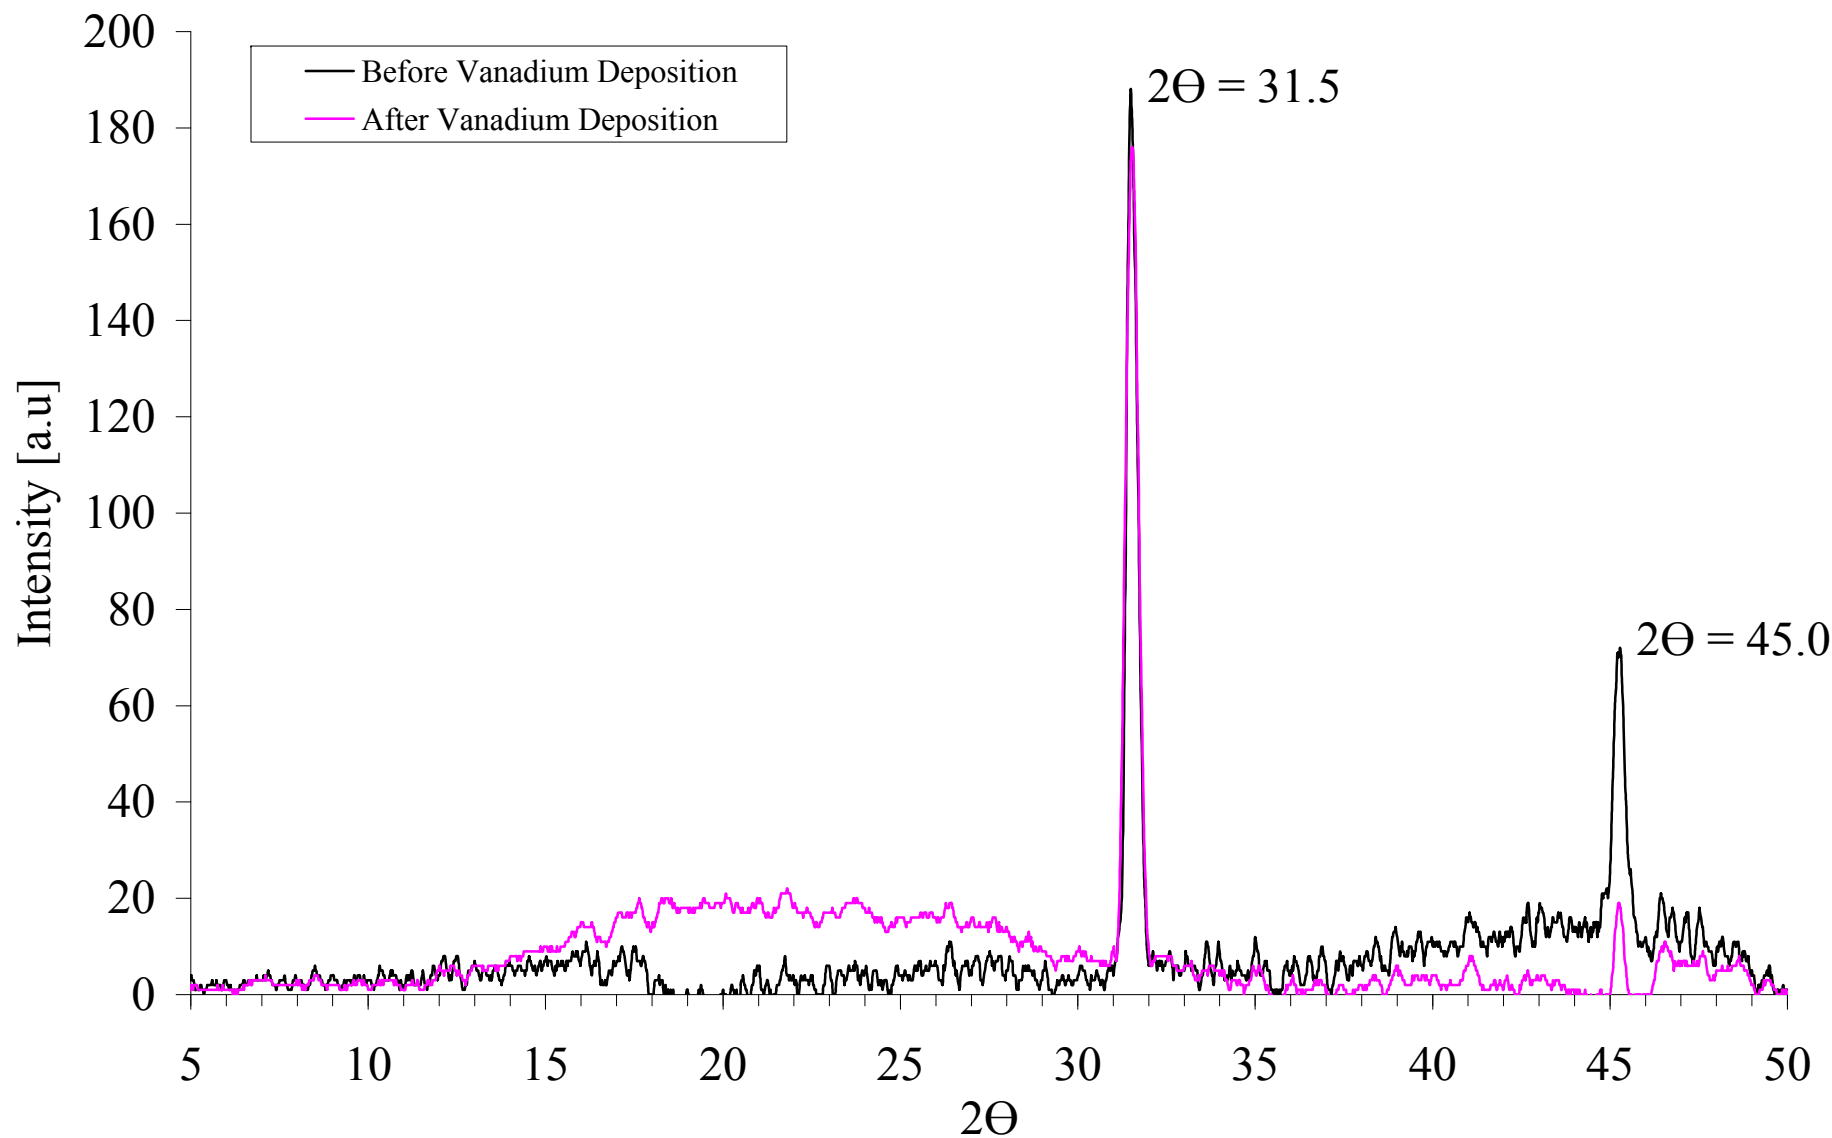

**Figure 1** - Wide angle powder XRD-pattern of the P/F resin before and after vanadium deposition. The patterns are characteristic for amorphous carbon frameworks.
