# Supplementary material for: Ultra stable ordered mesoporous phenol/formaldehyde polymers as a heterogeneous support for vanadium oxide
Source: Royal Society of Chemistry journal article supplement (doi:10.1039/b808566h), 2008-01-01
Supplement: b808566h2.pdf [file b808566h2.pdf]

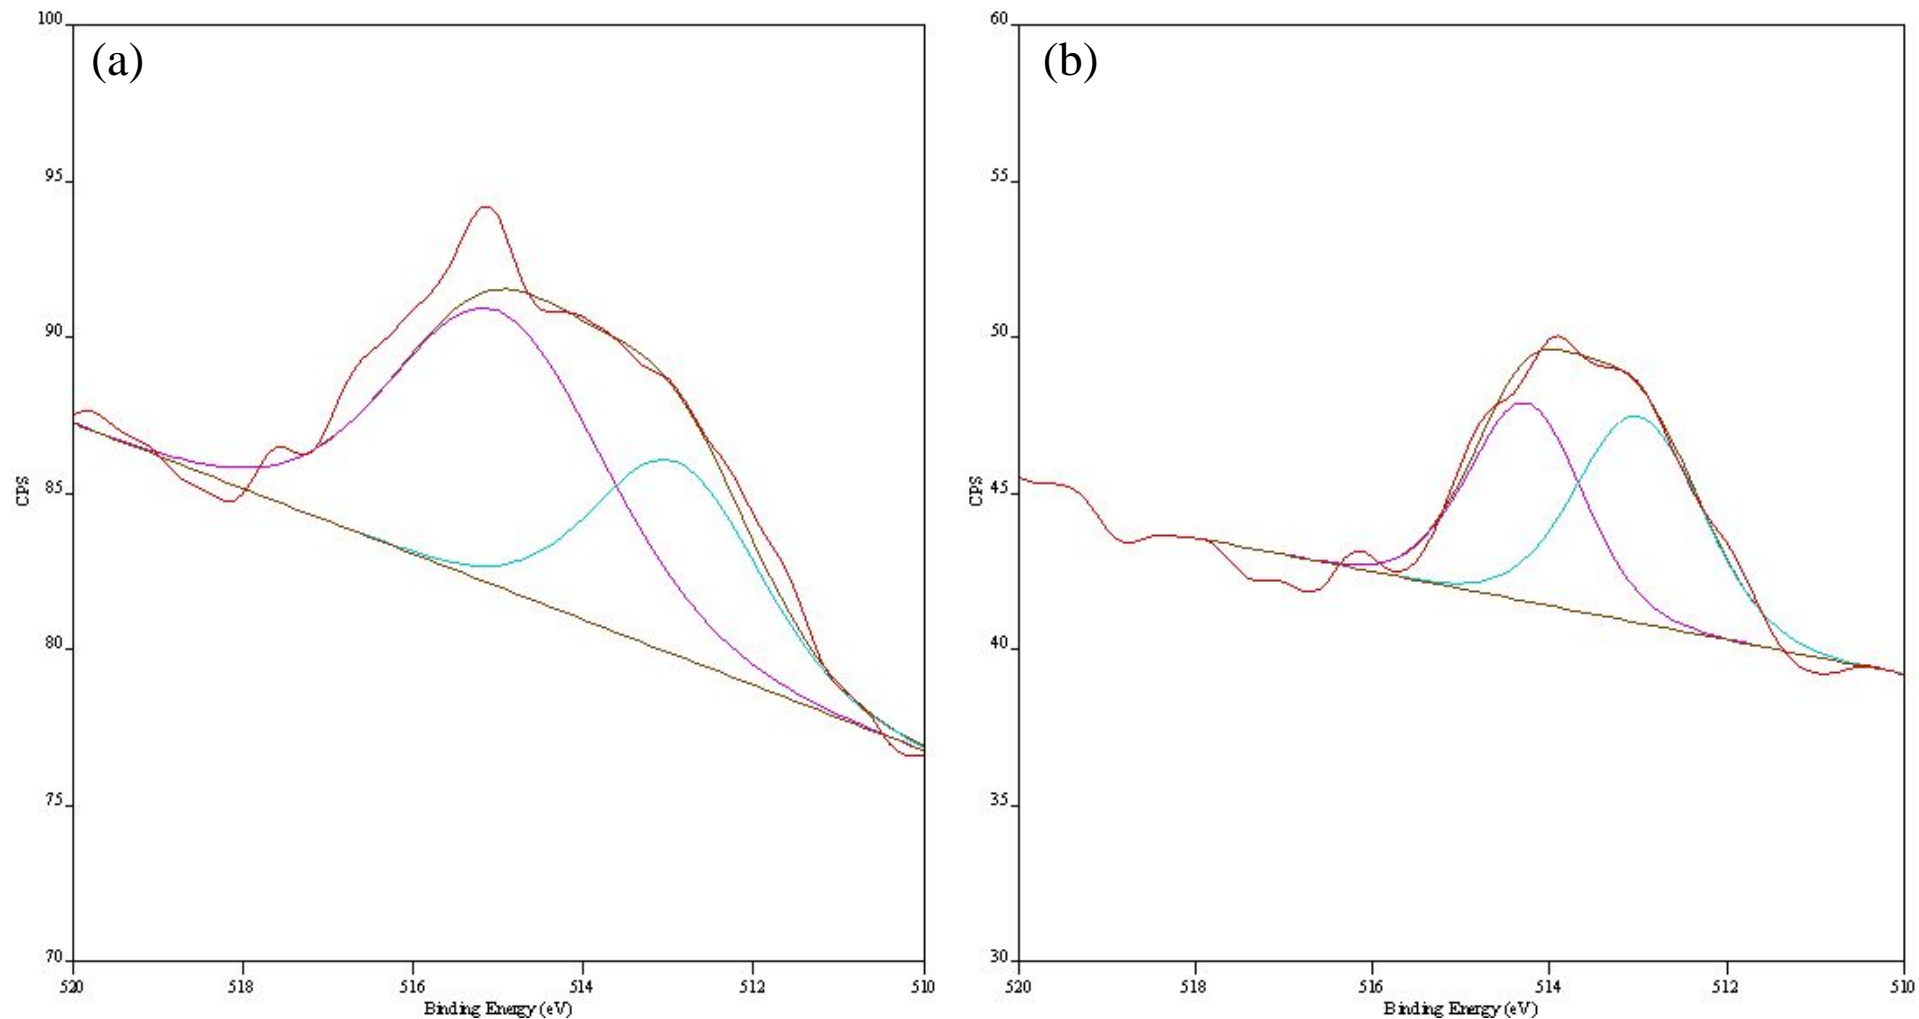

**Figure 2** – V<sub>2p<sup>3/2</sup></sub> region in the XPS spectra of phenol/formaldehyde resin after gas phase deposition of VOCl<sub>3</sub> (a) before and (b) after argon bombardment. The ratio 4+:5+ increases from 35:65 to 47:53 after sputtering.
