# Supplementary figures and images for: Ultra stable ordered mesoporous phenol/formaldehyde polymers as a heterogeneous support for vanadium oxide
Source: Royal Society of Chemistry journal article supplement (doi:10.1039/b808566h), 2008-01-01

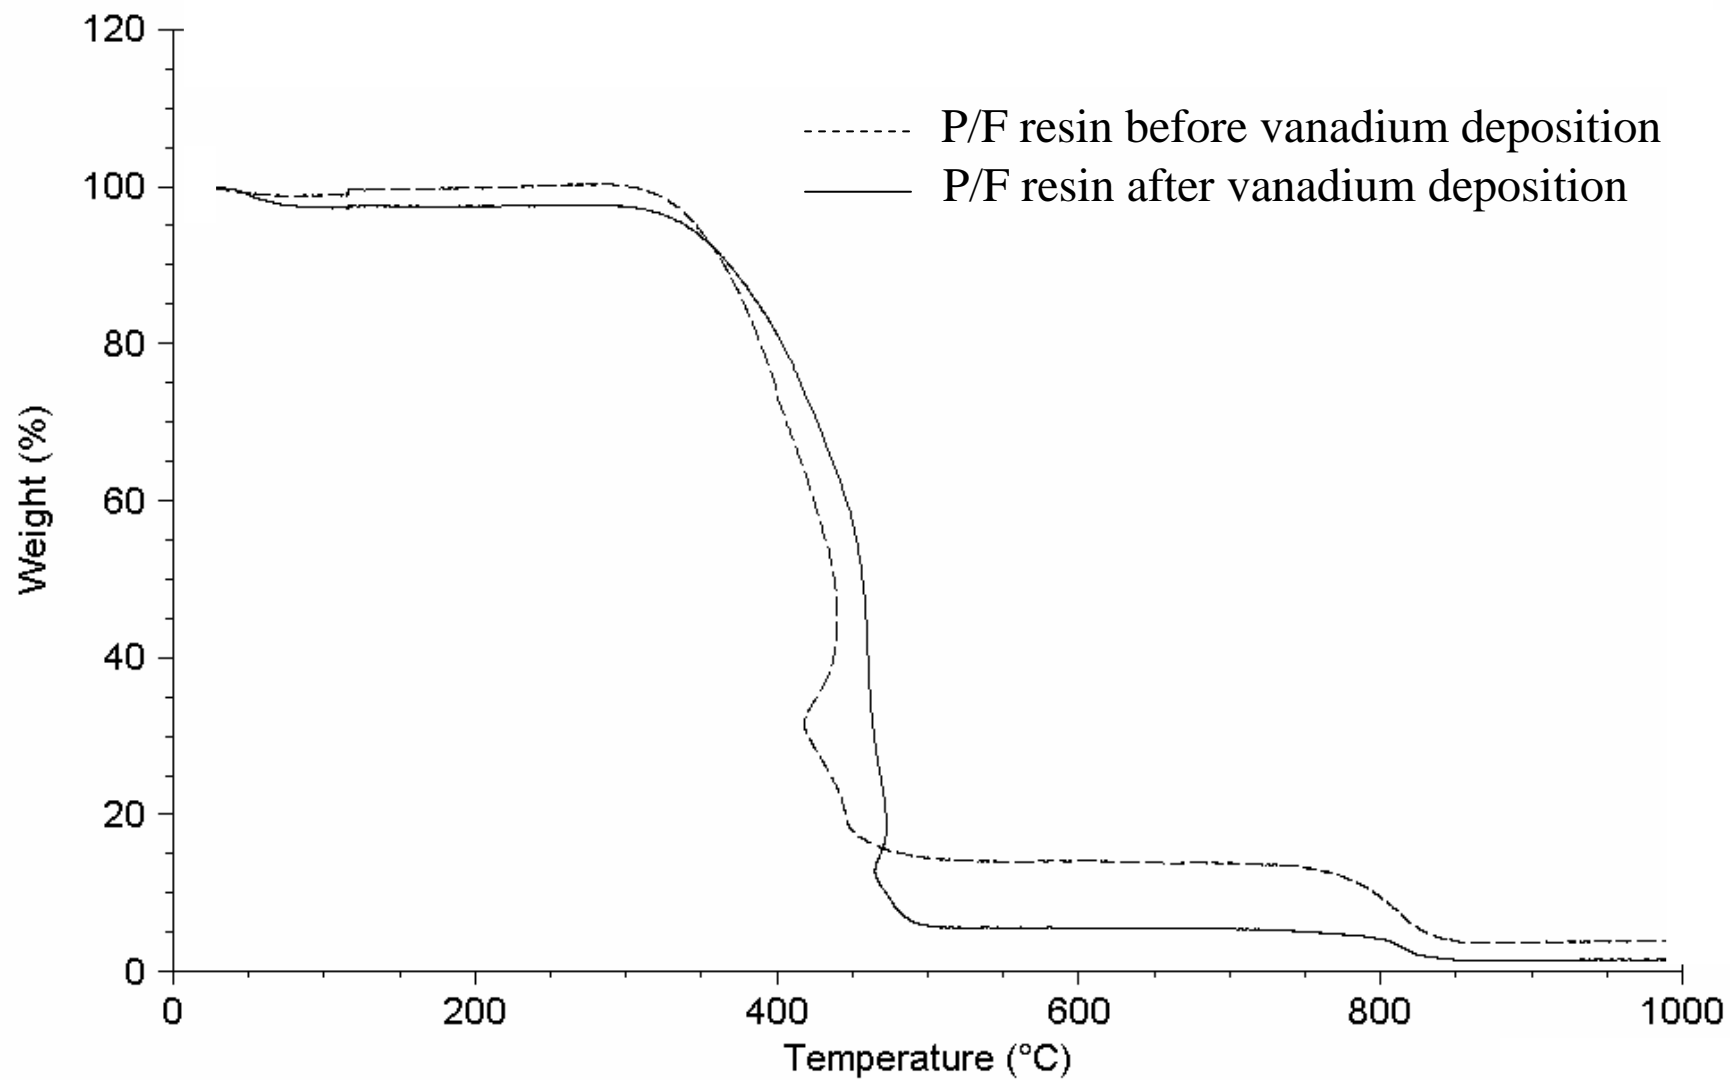

**Figure 3** - TGA measurement under air (10°C/min) of the P/F resin

Supplement: b808566h3.pdf [file b808566h3.pdf]

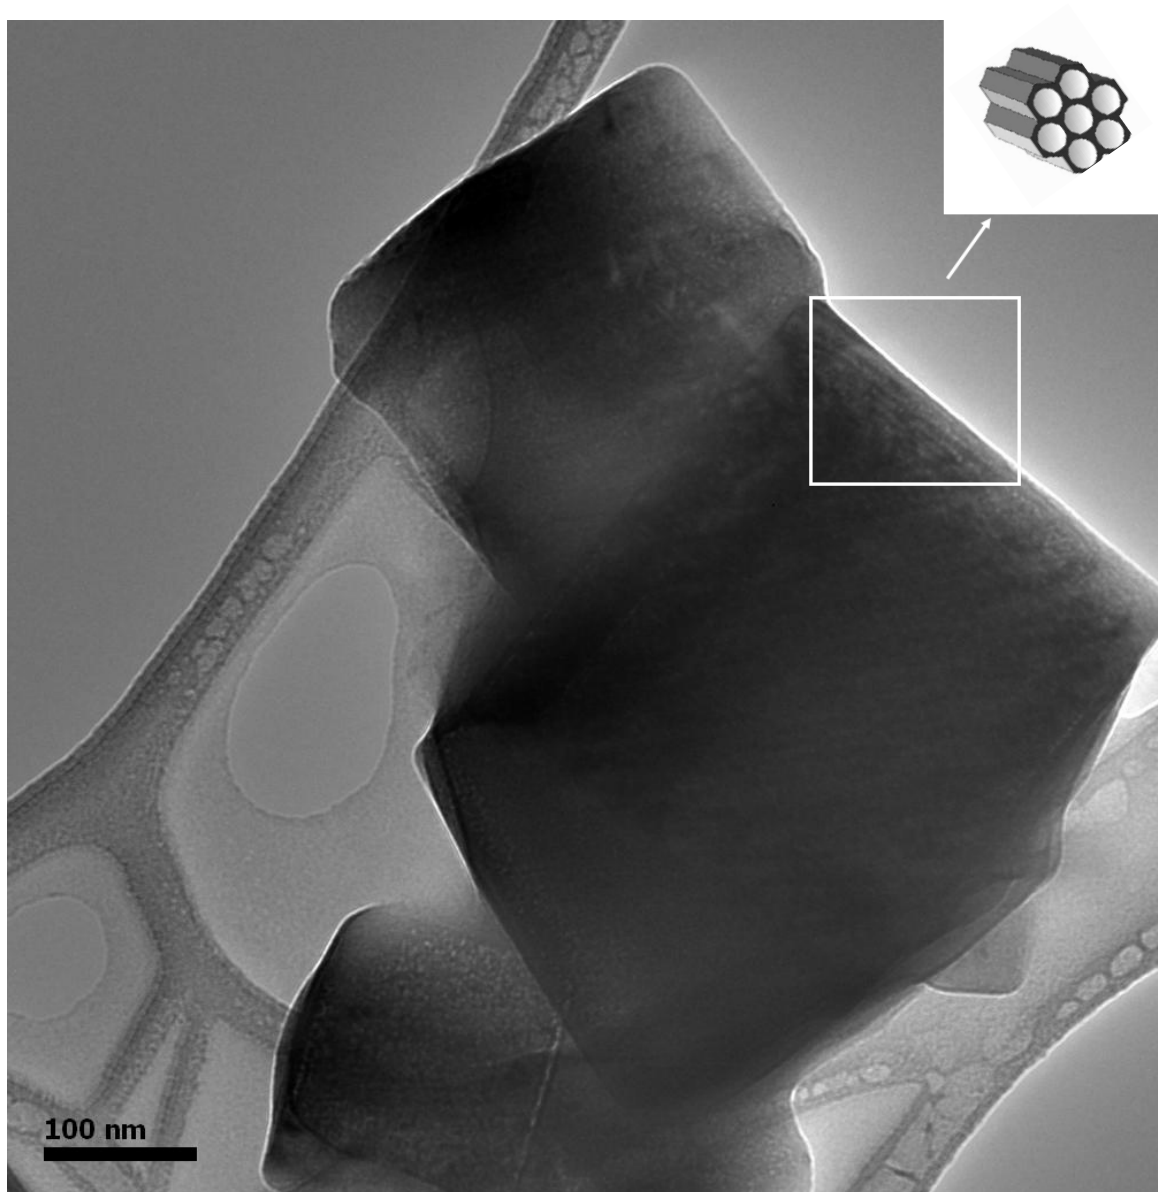

**Figure 4** - TEM image of mesoporous P/F resin calcined at 350°C

Supplement: b808566h4.pdf [file b808566h4.pdf]

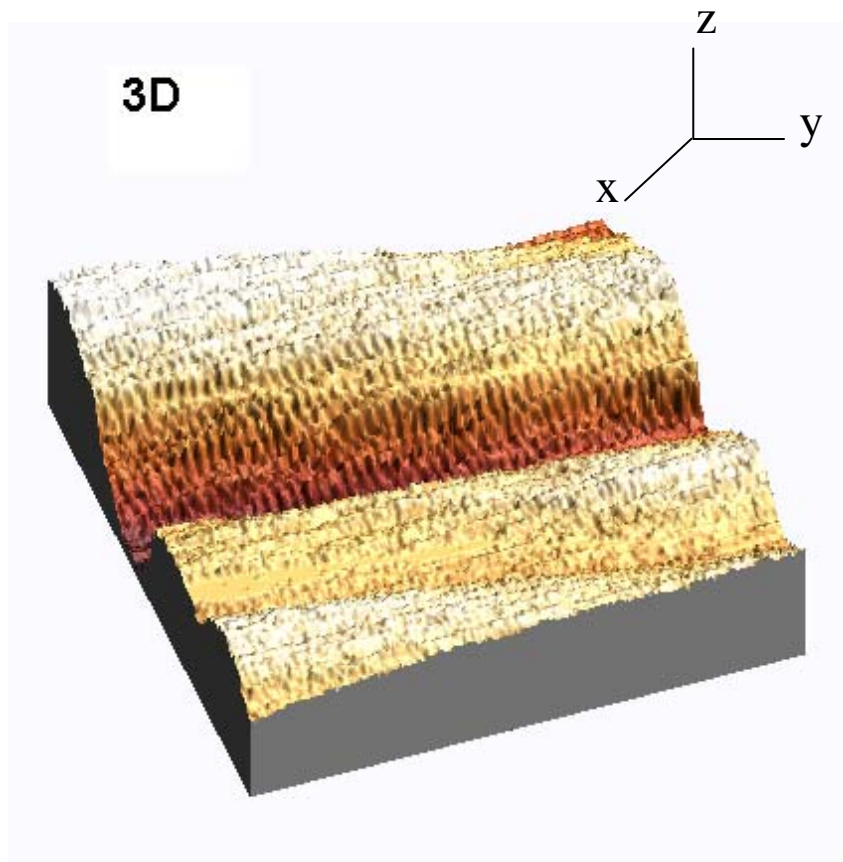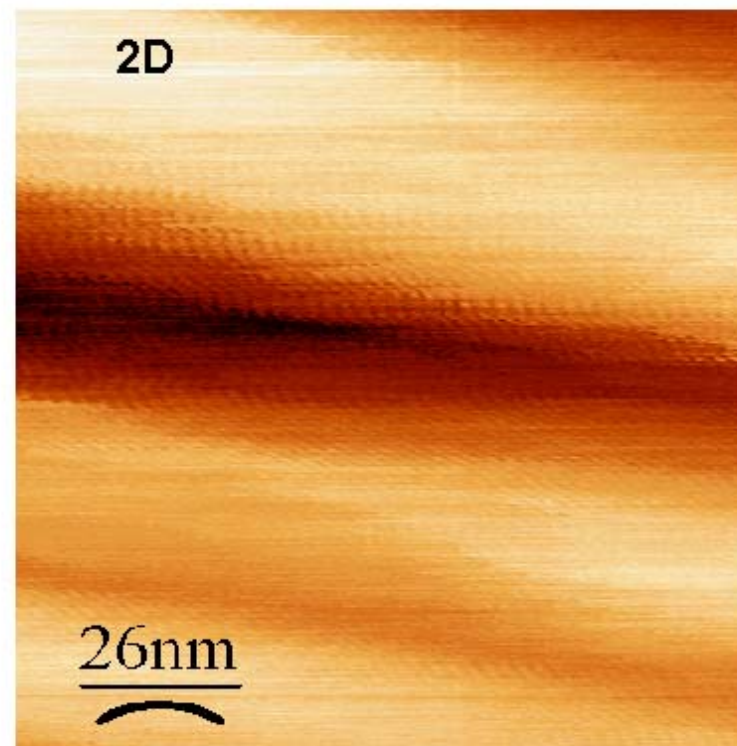

**Figure 5** – 3D and 2D AFM images of mesoporous P/F resin calcined at 350°C

Supplement: b808566h5.pdf [file b808566h5.pdf]
